# Supplementary material
Source: publisher site journal article supplement (https://www.dovepress.com/article/258479)
Supplement: Supplementary file 1 [file get_supplementary_file.php]

**Appendix 1 Physician’s questionnaire on COPD**

Hello；

According to the national health reform policy requirements, we aim to promote the education of the health workers, to improve the COPD handling ability in diagnosis, treatment, prevention, teaching and scientific research, and to carry out the COPD hierarchical diagnosis technology. As a result, the Enjoy Breathing Program, hosted by both Medical Cluster for Respiratory Diseases and National Clinic Research Center for Respiratory Diseases, is under the guidance of national bureau of medical administration and supervision, and the department of primary health care.

We thank you for your support and cooperation in filling the following questionnaire!

Enjoy Breathing project office

1. Personal information

1.1 Name

1.2 Gender A. male B. female

1.3 Cell phone number:

1.4 Birth date

1.5 Education background

A. doctorate B. master C. bachelor D. junior college E. Specialized Secondary Schools and below

1.6 The name of your hospital affiliation

1.7 The grade of the affiliation

A. tertiary, B. secondary, C. class 1, D. Community health center/station E. township hospital/clinic F. others

1.8 The region of the affiliation

1.9 Work date

1.10 Specialty

A. general practice b. internal medicine (no subspecialty) c. specialist (respiratory medicine) d. specialist (non-respiratory medicine) e. traditional Chinese medicine F. others

1.11 technical rank

A senior B mediate C junior D No

1.12 Do you smoke?

A. never smoke b. smoking or have given up no more than 6 months c. have given up smoking more than 6 months

2. COPD questionnaire

2.1 Have you ever heard of pulmonary function test?

A Yes

B No

2.2 What is the gold standard for diagnosing COPD?

A. do not know b. symptoms c. signs d. lung function e. chest X-ray or CT examination

2.3 What are the main risk factors for COPD?

A.do not know c. history of repeated lower respiratory tract infections d. outdoor air pollution e. indoor air pollution F. Occupational dust or chemical smoke exposure g. second-hand smoke h. long history of cardiovascular disease i. genetic factors

2.4 Based on your long-term clinical practice, which are the main symptoms of COPD?

A. do not know B. Chronic cough C. sputum D. chest pain E. chest stuffiness F. wheeze G. dyspnea

2.5 What are the main aim of therapy, when preparing a treatment plan for patients diagnosed with COPD for the first time?

A. do not know B. Reduce the number of acute exacerbations C. improve quality of life D. improve lung function E. Improve the clinical symptoms such as dyspnea

2.6 How much lower should FEV1/FVC in patients with COPD be after bronchodilator inhalation to determine persistent airflow limitation?

A.do not know

B.80%

C.70%

D.50%

E.30%

2.7 According to the assessment of lung function for limited airflow severity, which is the ratio of FEV1 to predict the value when COPD is of level Ⅱ (moderate)?

A. do not know

B.＜30%

C.30～49%

D.50～79%

E.≥80%

2.8 What are the management aim during stabilization?

A. do not know

B. Relieve symptoms

C. Improve health condition (including psychology)

D. prevent disease progression

E. Prevent and treat acute exacerbations and reduce mortality

2.9 What is the most common cause of acute exacerbation of COPD?

A. do not know

B. Serious air pollution

C. congestive heart failure

D. pneumonia

E. trachea and bronchial infection

F. Unauthorized withdrawal or irregular use of medication

G. acute upper respiratory tract infection

H. Smoking

2.10 What are the non-medication treatment measures for COPD?

A. do not know

B. smoke cessation

C. Strengthen occupational exposure protection and control environmental pollution

D. oxygen therapy

E. noninvasive ventilation

F. Respiratory rehabilitation exercises

G. nutritional support

H. home management and follow-up

J. Health education

2.11 What are the main medications for COPD?

A. do not know

B. ß2 receptor agonists

C. anticholinergics

D. methyl xanthine

E. inhaled glucocorticoids

F. inhaled combined preparations

G. antibiotics

H. expectorant

I. traditional Chinese medicine

J. Vaccination

2.12 According to the GOLD guidelines, what could be used to assess COPD?

A do not know

B. Classification of restricted airflow in pulmonary function

C. respiratory symptoms

D. History of acute exacerbations in the past year (frequency)

E. other co-existing diseases or complications

F. CAT score and mMRC rating

2.13 COPD training in the past 1 year

2.13.1 How many times of training?

A 0 B 1-2 C 3-5 D >5

2.13.2 how many days of training?

A 0 days B 1-2 days C 3-15 days D 16-30 days E 31-180 days F 181-365 days

2.14 Which kind of COPD training did you receive the in past 1 year?

A. academic conferences

B. continuing education programs

C. online training

D. practice in other hospitals

E. training in your hospital

F. other

G.no

2.15 What content did you learn from the COPD training?

A. epidemiology of COPD

B. Prevention policies and strategies

C. diagnosis and treatment of COPD and its progress (theory)

D. diagnosis and treatment of COPD technical training (practical operation)

E. patient health education and home management

F. Use of management information systems

G. Training of COPD research ability

H. other

J. NO

2.16 How many times did your medical institution conduct COPD patient education in the past 1 year?

A 0 times B 1-2 times C 3-5 times D 6-12 times E 13 times or more

2.17 What kinds of COPD education activities have your organization carried out?

A. distribute manuals or popular science books

B. Playing or distributing popular science CDS

C. Construct health promotion column/window/exhibition area

D. Conducting online or field health education lectures

E. Provide long-term illness consultation or hold free clinic activities regularly

F. Open COPD special clinic or joint clinics with other specialties

G. Organize activities with medical group institutions or community health centers

H. other

2.18 What kind of COPD training do you need?

A. diagnosis and treatment of COPD

B. Prevention and treatment strategies for COPD

C. COPD diagnosis and treatment theory training (lung function, sputum induction and sleep assessment, etc.)

D.COPD diagnosis and treatment practical operation training

E. respiratory rehabilitation training for COPD

F. Home management and health education for COPD patients

G. Use of standardized management information system for COPD patients

H. Improvement of COPD clinical research ability

J. Improvement in COPD basic scientific research

K. others

**Appendix 2 Chronic obstructive pulmonary disease screening questionnaire***

1. How old are you?

40-49/50-59/60-69/≥70 years

2.Do you often cough?

Yes/No

3.Body mass index (kg/m2)

<18.5/18.5-23.9/24.0-27.9/≥28.0 kg/m2

4.Smoking intensity (average number of packs of cigarettes smoked per day multiplied by smoking years)

Never smoker/1-14.9/15-29.9/≥30 pack-year

5.Family history of respiratory disease

Yes/No

6.Exposure to biomass smoke from cooking fires

Yes/No

7.Which is the best description for your dyspnea?

(1) I don’t have a problem of breathlessness except during strenuous exercise.

(2) I experienced shortness of breath when I was hurrying on flat ground or walking up a small slope.

(3) I walk more slowly than people of the same age on flat ground due to breathlessness or have to stop for breath when I’m walking at my own pace on flat ground.

(4) I have to stop for breath after walking on flat ground for about 100 meters or after a few minutes.

(5) I am too breathless to leave the house or become breathless when I dress or undress.

**Note:** *Reprinted with permission of the International Union Against Tuberculosis and Lung Disease. Copyright © The Union. Zhou YM, Chen SY, Tian J, et al. Development and validation of a chronic obstructive pulmonary disease screening questionnaire in China. *Int J Tuberc Lung Dis*. 2013;17:1645–1651. doi:10.5588/ijtld.12.0995.1

**Appendix 3 patient COPD knowledge questionnaire**

1.Have you heard of COPD?

A Yes

B No

(if answer no, please finish this survey until answering the first 4 questions)

2.Have you done pulmonary function test?

A Yes

B No

3.Would you like to acquire knowledge about COPD prevention and therapy?

A Yes

B No (if answer no, please turn to the No. 5 question)

C It does not matter

4. How do you want to acquire knowledge about COPD prevention and therapy?

A routine outpatient visits

B home visits

C telephone consultation

D. Communicate with other patients

F. Newspapers and magazine

G Broadcasting and TV

H. free brochure

I. free clinic, consultation and lecture

J. New medium platform such as wechat

K. Others

5. Do you know those at high risk for COPD?

A. do not know

B. aged people

C. smoker

D those who long-term cook or heat by wood and coal

E those who long-term exposure to dust fumes and harmful gases

F. those who experience lower respiratory tract infection recurrently

G. heredity

H. Those in air pollution environment for a long time

I. those with asthma history

J. those with tuberculosis history

6.Do you know the symptom of COPD?

A do not know

B chronic cough

C sputum

D chest pain

E chest stuffiness

F wheeze

H dyspnea

I pedal edema

J. Digestive system symptom (abdominal pain, diarrhea, etc.)

7.Does pneumonic vaccine prevent COPD exacerbation?

A. yes

B. no

C. do not know

8. Does smoke cessation relieve the symptom of COPD?

A. yes

B. no

C. do not know

9. Does exercise (such as walking, Taiji, riding bicycle etc.) improve the immune system of COPD patients?

A. yes

B. no

C. do not know

10. Does COPD patient need to take medicine for a long time?

A. yes

B. no

C. do not know

11. Do you know the measures for treating COPD?

A. do not know

B. occupational protection

C. using clean fuel and ventilating the kitchen

D. preventing respiratory infection

E. pulmonary rehabilitation

F. oxygen therapy

G. influenza vaccination

H. smoke cessation

12. Which medicine could be used to treat COPD?

A. do not know

B. inhale medicine

1.ventolin 2xinbikedubao 3. atrovent 4. spiriva 5. seretide 6. others

C. expectorant: Aminophylline, theo-dur, mucosolvin, glycyrrhiza tablets, acetylcysteine

D. antibiotics (cephalosporin, penicillin, azithromycin)

E. oral glucocorticoids (prednisone, methylprednisolone, etc.)

F. Chinese traditional medicine

13. Which is the preferred therapy for COPD

A. do not know

B inhale medicine

C. oral medicine

D intravenous infusion

E oxygen

F. Respiratory rehabilitation exercises

G. physical therapy

14. Have you taken inhaled medicine?

A yes

B no (if answer no, please finish the survey)

15. Have your physicians or nurses taught you how to use the machine for inhale medicine?

A. Yes

B. no

**Appendix 4** **COPD assessment test (CAT) questionnaire***

| I never cough | 0 | 1 | 2 | 3 | 4 | 5 | I cough all the time |
| --- | --- | --- | --- | --- | --- | --- | --- |
| I have no phlegm (mucus) on my chest at all | 0 | 1 | 2 | 3 | 4 | 5 | My chest is full of phlegm(mucus) |
| My chest does not fell tight at all | 0 | 1 | 2 | 3 | 4 | 5 | My chest feels very tight |
| When I walk up a hill or a flight of stairs, I am not out of breath | 0 | 1 | 2 | 3 | 4 | 5 | When I walk up a hill or a flight of stairs I am completely out of breath |
| I am not limited to doing any activities at home | 0 | 1 | 2 | 3 | 4 | 5 | I am completely limited to doing all activities at home |
| I am confident leaving my home despite my lung condition | 0 | 1 | 2 | 3 | 4 | 5 | I am not confident leaving my home at all because of my lung condition |
| I sleep soundly | 0 | 1 | 2 | 3 | 4 | 5 | I do not sleep soundly because of my lung condition |
| I have lots of energy | 0 | 1 | 2 | 3 | 4 | 5 | I have no energy at all |

**Note:** *Reproduced with permission from Jones PW, Harding G, Berry P, Wiklund I, Chen WH, Leidy NK. Development and first validation of the COPD assessment test. *Eur Respir J.* 2009;34:648–654.2

**References:**

1. Zhou YM, Chen SY, Tian J, et al. Development and validation of a chronic obstructive pulmonary disease screening questionnaire in China. *Int J Tuberc Lung Dis*. 2013;17:1645–1651. doi:10.5588/ijtld.12.0995
2. Jones PW, Harding G, Berry P, Wiklund I, Chen WH, Leidy NK. Development and first validation of the COPD assessment test. *Eur Respir J.* 2009;34:648–654.
